# Supplementary material
Source: Springer Nature journal article supplement (https://www.springermedizin.de/resource/supplementary/13048_2013_159_MOESM1_ESM.pdf/9665024)

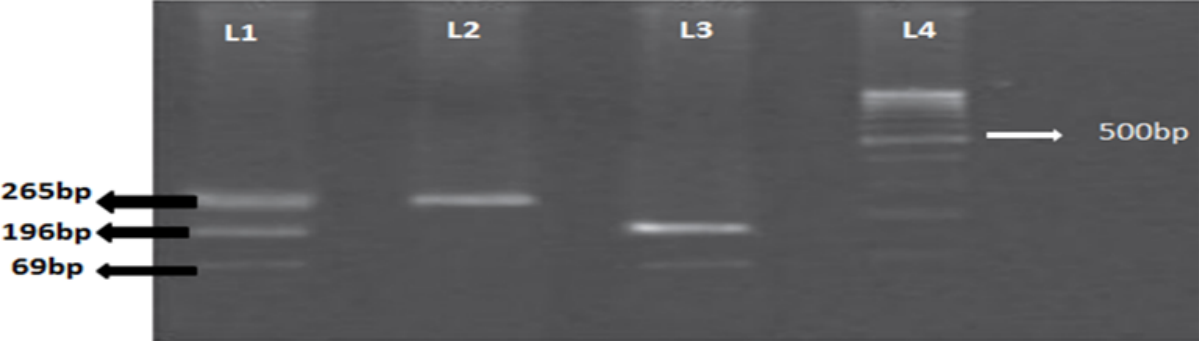

Supplement: MOESM1 [file 9665024]
